# Supplementary material for: EGFR/FOXO3a/BIM signaling pathway determines chemosensitivity of BMP4-differentiated glioma stem cells to temozolomide
Source: PubMed Central journal article supplement (PMC8080762; doi:10.1038/s12276-020-0479-9), 2020-08-12
Supplement: 12276_2020_479_MOESM1_ESM.pdf [file 12276_2020_479_MOESM1_ESM.pdf]

**EGFR/FOXO3a/BIM signalling pathway determines chemosensitivity of BMP4-differentiated glioma stem cells to temozolomide**

**Iwona Anna Ciechomska<sup>1</sup>, Bartłomiej Gielniewski<sup>1</sup>, Bartosz Wojtas<sup>1</sup>, Bożena Kamińska<sup>1#</sup>, Jakub Mieczkowski<sup>1#</sup>**

<sup>1</sup>Laboratory of Molecular Neurobiology, Neurobiology Center, Nencki Institute of Experimental Biology PAS, 3 Pasteur St, 02-093 Warsaw, Poland

**Supplementary Information**

# Figure S1

**a**

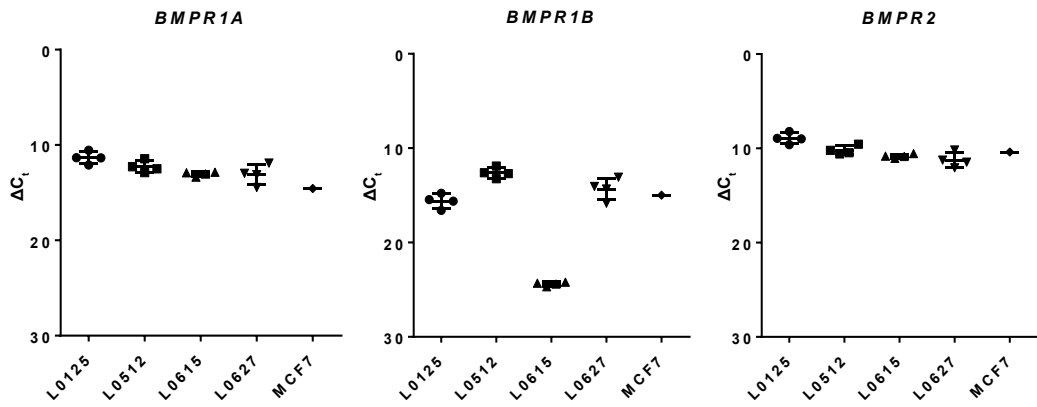

**b**

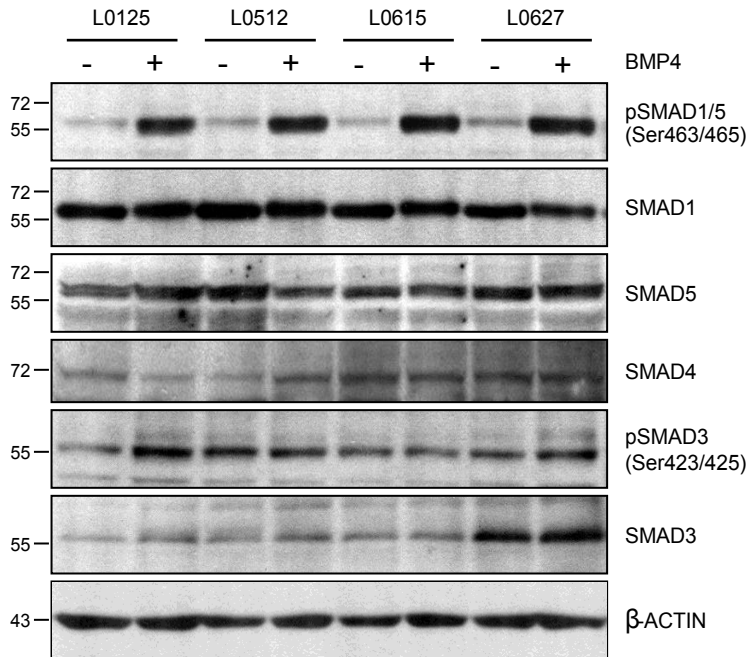

**c**

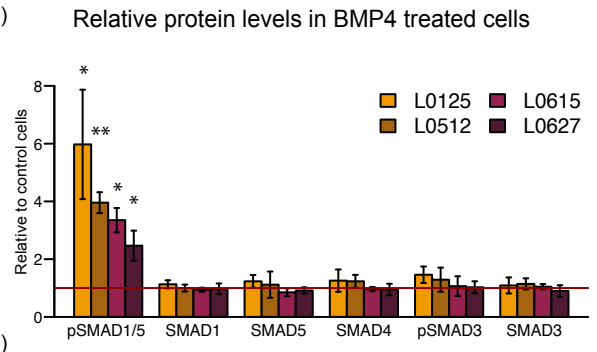

## Figure S1. Activation of BMP signaling pathway.

(a) Quantitative analysis of *BMPR1A*, *BMPR1B*, *BMPR2* gene expression in human glioma spheres as determined by qPCR. MCF7 cell line was used as a positive control. (b) Western blot analysis of SMAD signalling cascade in GSCs. Immunoblot shows the levels of phospho-SMAD1/5 (Ser463/465), phospho-SMAD3 (Ser423/425), SMAD1, SMAD3, SMAD4 and SMAD5 in glioma spheres treated with 100 ng/ml BMP4 for 90 min. Antibody against  $\beta$ -Actin was used to ensure an equal protein loading. (c) Densitometric analysis of the blots and quantification of the results from three independent experiments is shown; bars represent means  $\pm$  SD of phospho-SMAD1/5 (Ser463/465), phospho-SMAD3 (Ser423/425), SMAD1, SMAD3, SMAD4, SMAD5 levels normalized to  $\beta$ -Actin and then to the control (\*P < 0.05, \*\*P < 0.01, t-test).

# Figure S2

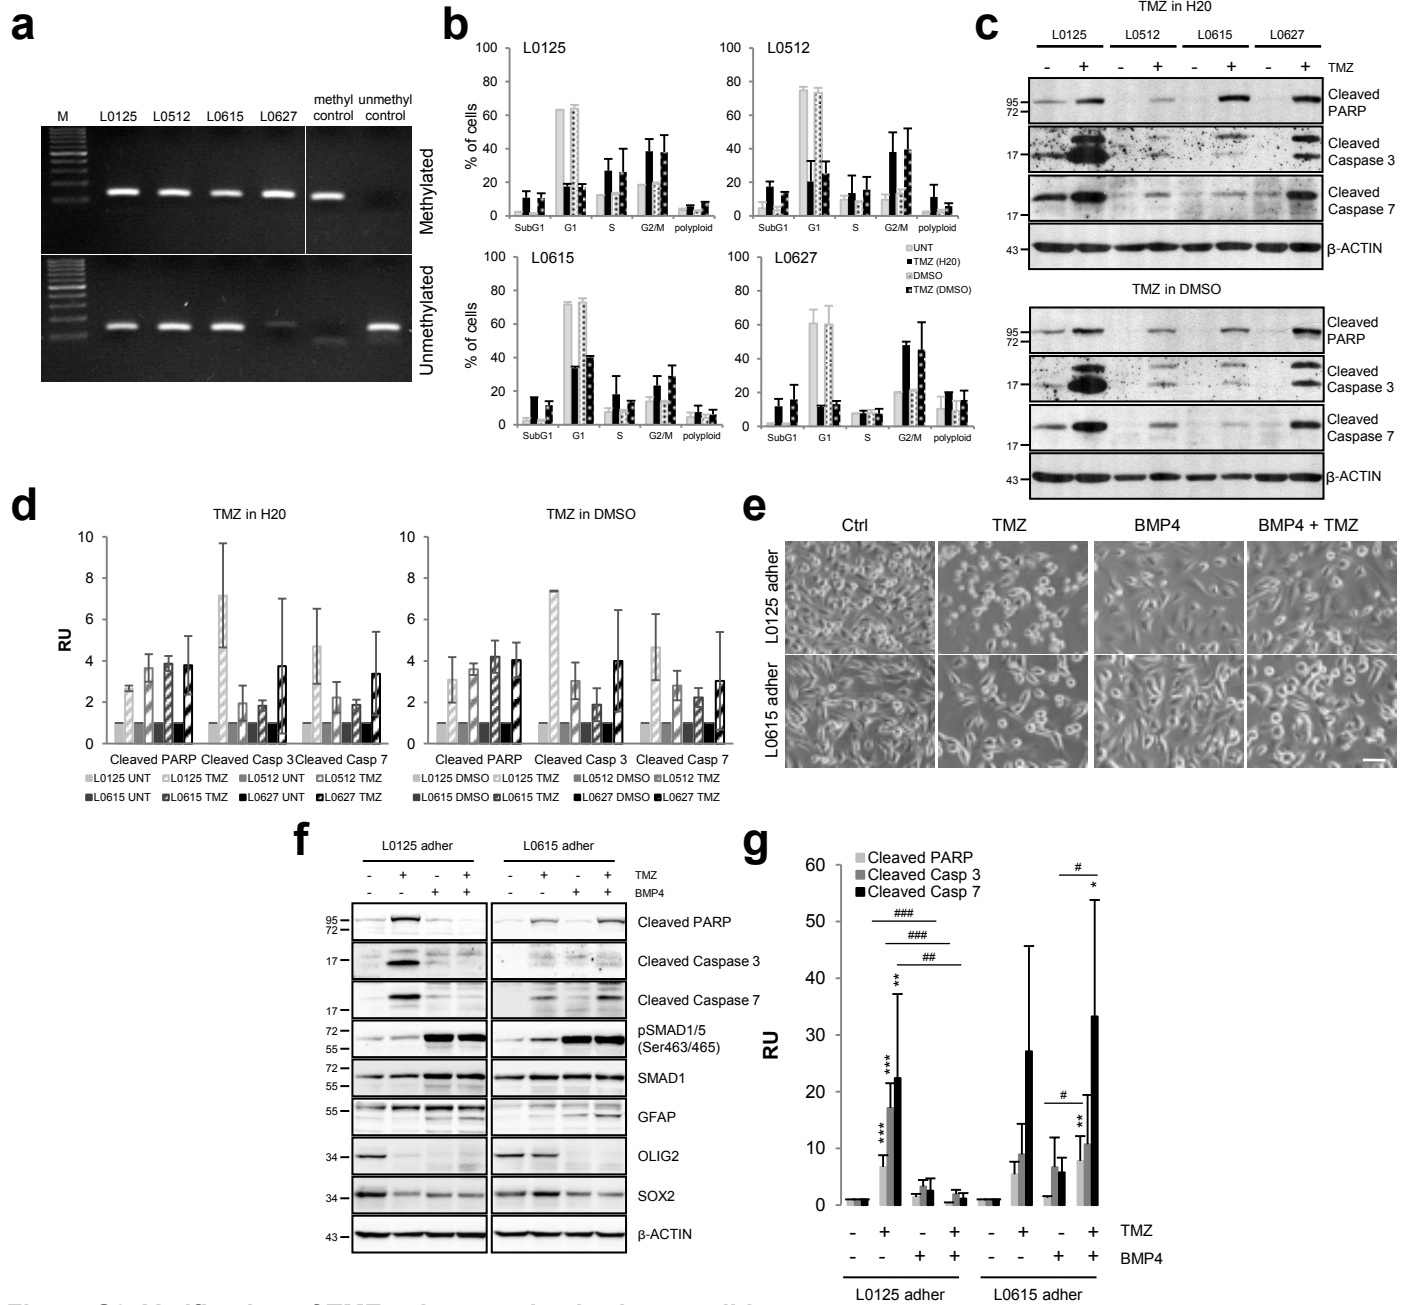

**Figure S2. Verification of TMZ solvent and culturing conditions.**

(a) Methylation status of *MGMT* gene promoter in GSC cell lines was determined by methylation-specific PCR assay. The PCR products were separated on 1.5 % agarose gel, visualized by SimplySafe staining. The methylated, as well as unmethylated, bisulfite converted DNA were used as a positive and negative controls for methylated or unmethylated templates, respectively. A 100-bp marker ladder was loaded to estimate molecular size. Representative results of three independent experiments are shown. (b) The effect of TMZ on the cell cycle. Cell cycle phases distribution in GSCs after 72 h TMZ (500  $\mu$ M) treatment was carried out using FACS caliber flow cytometer by DNA staining with propidium iodide. Results are presented as means  $\pm$  SD of two independent experiments. (c) Western blot analysis of biochemical markers of apoptosis. Immunoblot shows the levels of Cleaved Caspase 3, Caspase 7 and PARP in control and TMZ-treated glioma cells. Antibody against  $\beta$ -Actin was used to ensure an equal protein loading. (d) Densitometric analysis of the blots and quantification of the results from two independent experiments is shown; bars represent means  $\pm$  SD of the cleaved caspases, and cleaved PARP levels normalized to the control and then to  $\beta$ -Actin. (e) Representative microphotographs of untreated adherent GSCs or treated with drugs. Pictures were taken after 4 days of BMP4 (100 ng/ml) treatment and additional 3 days with or without TMZ (500  $\mu$ M). Scale bars represent 50  $\mu$ m. (f,g) Western blot (f) and the densitometric analysis (g) of biochemical markers of apoptosis. Immunoblots show the levels of Cleaved Caspase 3, Caspase 7 and PARP, as well as phospho-SMAD1/5 (Ser463/465), SMAD1, GFAP, OLIG2, SOX2 in untreated, BMP4- and/or TMZ-treated adherent GSCs. (f) Cell lines and combination of treatments are indicated on the top. Antibody against  $\beta$ -ACTIN was used to ensure an equal protein loading. (g) Each bar represents mean  $\pm$  SD of three independent experiments. \* $P < 0.05$ , \*\* $P < 0.01$ , \*\*\* $P < 0.001$  compared to untreated control; # $P < 0.05$ , ## $P < 0.01$ , ### $P < 0.001$  BMP4 or TMZ-treated cells versus cells treated with both drugs (post-hoc test in ANOVA).

**Figure S3**

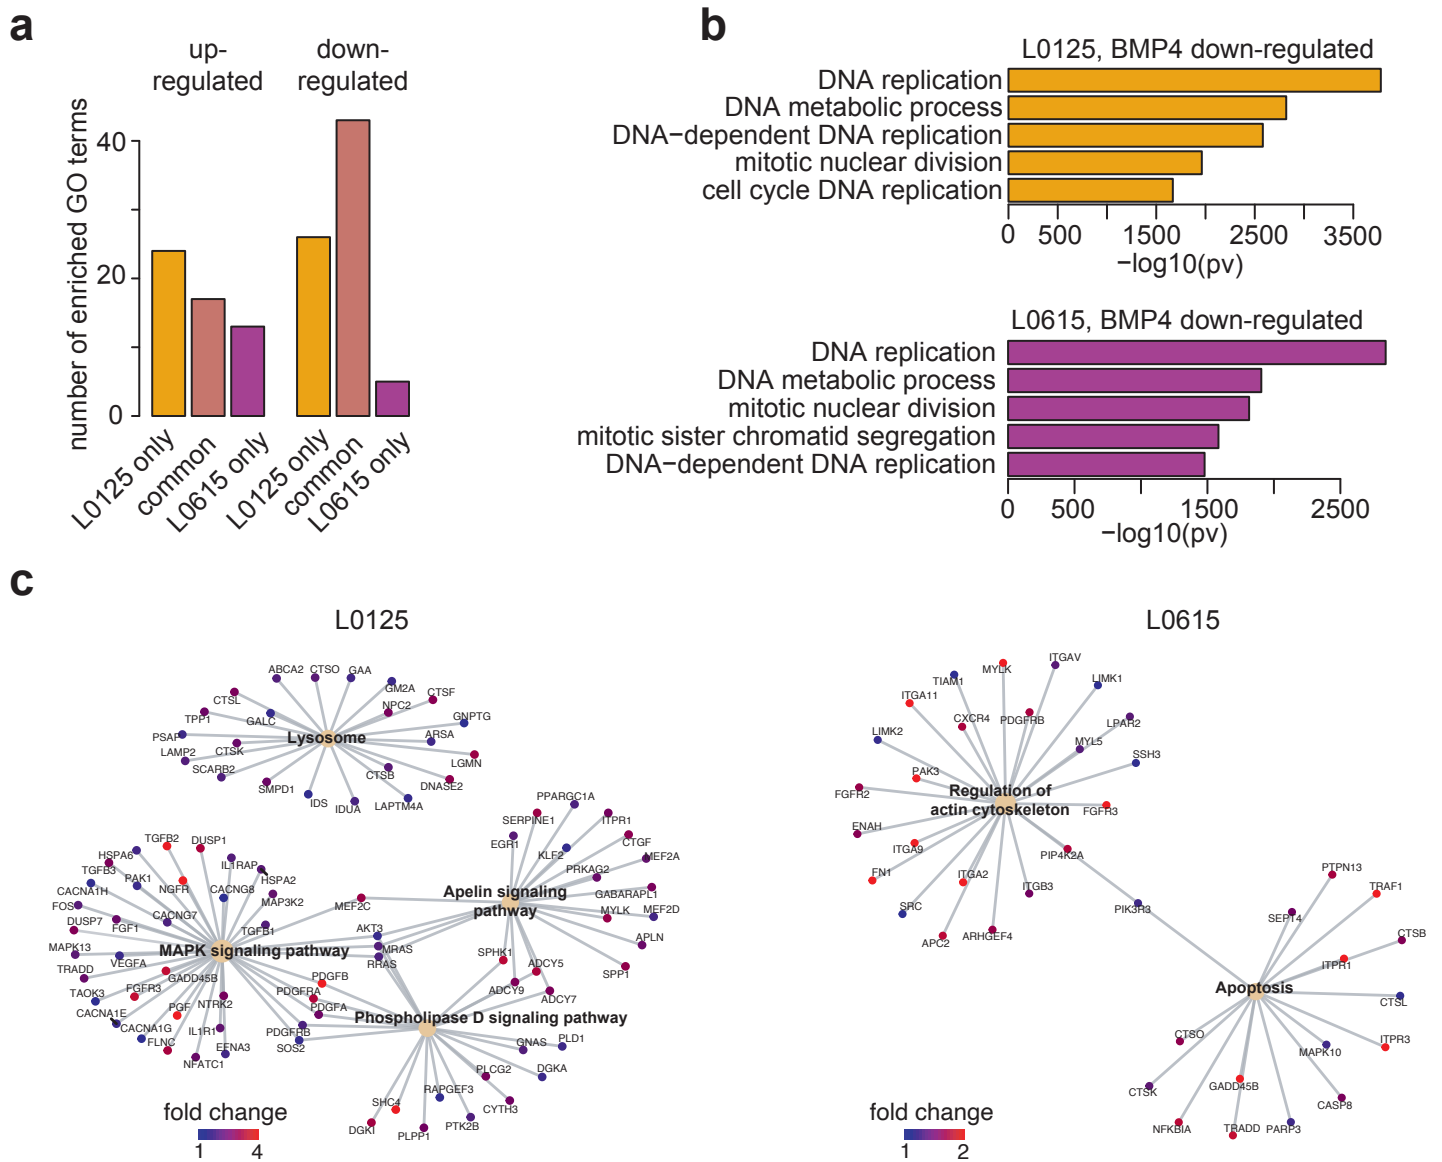

**Figure S3. Gene ontology analysis and genes belonging to specifically up-regulated signalling pathways**

(a) Number of Gene Ontology terms significantly enriched in the sets of differentially down- or up-regulated genes. Left bars correspond to sets of up-regulated genes, while right bars correspond to sets of down-regulated genes. Yellow and purple bars depict results specific for to L0125 and L0615 cell lines, respectively. Light purple bars (second and fifth from the left) show number of non-specifically enriched pathways. (b) Top 5 Gene Ontology terms enriched in sets of genes significantly down-regulated genes after BMP4-treatment. Yellow panel corresponds to L0125 cell line and purple panel corresponds to L0615 cell line. X-axes on both plots represent Benjamini and Hochberg adjusted P-values computed with Fisher's exact test. (c) Networks visualizing signalling pathways specifically up-regulated in L0125 (left) and L0615 (right) cell lines. These results correspond to Figure 3f.

# Figure S4

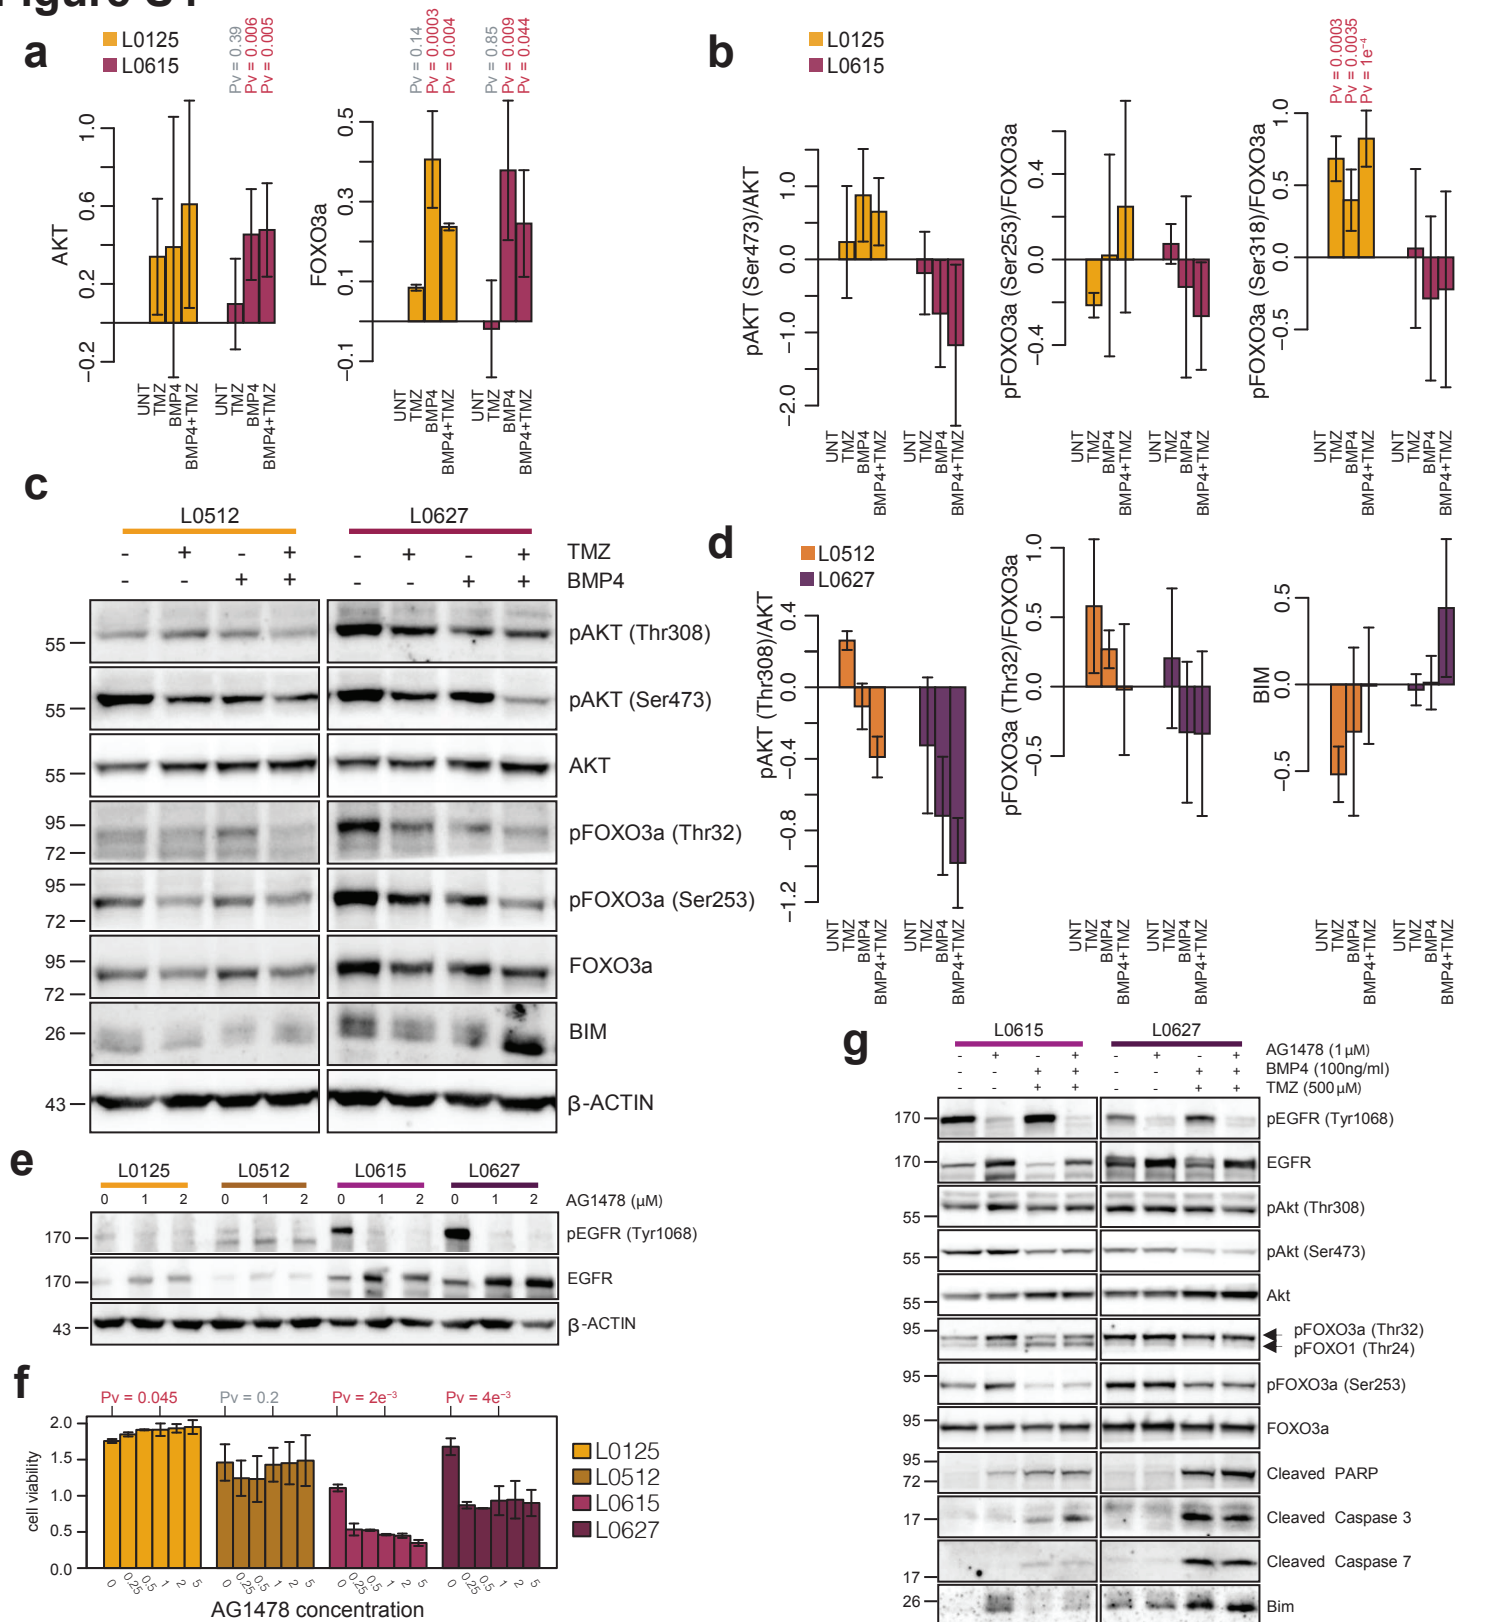

**Figure S4. Verification of AKT/FOXO3a/BIM apoptotic axis activation.**

**(a)** A densitometric analysis of total AKT and FOXO3a levels. These results correspond to Figure 4c. Each bar and whisker represent the mean  $\pm$  SD of three independent experiments. The total protein levels were normalized to  $\beta$ -ACTIN. See legend for Figure 1f for more details on statistical analysis. **(b)** The densitometric analysis of phospho-AKT (Thr473) and phospho-FOXO3a (Ser253 and Ser318). These results correspond to Figure 4c. Each bar and whisker represent the mean  $\pm$  SD of three independent experiments (log-scale). The levels of phosphorylated proteins were normalized to corresponding total protein levels. See legend for Figure 1f for more details. **(c)** Western blot analysis of total- and phospho-AKT, total- and phospho-FOXO3a and BIM levels upon exposure to TMZ, BMP4 or both drugs.  $\beta$ -ACTIN was used as a loading control. **(d)** The densitometric analysis of phospho-AKT (Thr308) phospho-FOXO3a (Thr32) and BIM levels performed with L0512 (EGFR<sup>low</sup>, orange bars) and L0627 (EGFR<sup>high</sup>, purple bars). Each bar and whisker represent the mean  $\pm$  SD of two independent experiments (log-scale). The levels of phosphorylated proteins were normalized to corresponding total protein levels and the BIM levels were normalized to  $\beta$ -ACTIN. See legend for Figure 1f for more details. **(e)** Western blot analysis of phospho-EGFR (Tyr1068) and EGFR in untreated and glioma spheres treated with 1, 2 mM AG1478 for 3 days.  $\beta$ -ACTIN was used as a loading control. **(f)** The effects of different doses of AG1478 on viability of EGFR<sup>low</sup> and EGFR<sup>high</sup> cells. The cells were treated for 3 days. The significance of difference was tested with paired t-test (n=3). **(g)** Western blot analysis of EGFR signaling pathway and biochemical markers of apoptosis. Immunoblots show the levels of total- and phospho-EGFR, total- and phospho-AKT, total- and phospho-FOXO3a, Cleaved Caspase 3, Caspase 7 and PARP, as well as BIM in untreated and treated EGFR<sup>high</sup> cells. Cells were exposure to AG1478 alone for 3 days, or first BMP4-differentated (for 4 days) then treated with TMZ alone (for 3 days) or with both drugs AG1478 and TMZ (for 3 days). Detection of  $\beta$ -ACTIN ensured an equal protein loading.

1 **Supplementary Table 1**

2 Sequences of primers used in this work.

3

|                             |                                   |                                  |
|-----------------------------|-----------------------------------|----------------------------------|
| BMPR1A_qPCR                 | CAGGTCCTGGACTCAGCTC               | CTTCCTTGGGTGCCATAAA-             |
| BMPR1B_qPCR                 | AAAGGTCGCTATGGGGAAGT              | GCAGCAATGAAACCCAAAAT             |
| BMPR2_qPCR                  | GCTAAAATTTGGCAGCAAGC              | CTTGGGCCCTATGTGTCCT              |
| SOX2_qPCR                   | GGGAAAGTAGTTTGCTGCC               | CGCCGCCGATGATTGTTATT             |
| PROM1_qPCR                  | TGGATGCAGAACTTGACAACGT            | ATACCTGCTACGACAGTCGTGGT          |
| OLIG2_qPCR                  | TCGCATCCAGATTTTCGGGT              | AAAAGGTCATCGGGCTCTGG             |
| NESTIN_qPCR                 | CAAGACTTCCCTCAGCTTTCAG            | AGGTGTCTCAAGGGTAGCAG             |
| GFAP_qPCR                   | TCCTGGAACAGCAAAACAAG              | CAGCCTCAGGTTGGTTTCAT             |
| TUBB3_qPCR                  | GTACGTGCCTCGAGCCATTCT             | CGTGTAGTGACCCTTGCC               |
| 18S_qPCR                    | CGGACATCTAAGGGCATCAC              | AACGAACGAGACTCTGGCAT             |
| Methylated<br>MGMT_MS-PCR   | TTTCGACGTTTCGTAGGTTTTCGC          | GCACTCTTCCGAAAACGAAACG           |
| Unmethylated<br>MGMT_MS-PCR | TTTGTGTTTTGATGTTTGTAGGTT<br>TTTGT | AACTCCACACTCTTCCAAAAACA<br>AAACA |
